# Supplementary material
Source: publisher site journal article supplement (https://www.spandidos-publications.com/8447/downloadSupplementary)
Supplement: Supplementary file 1 [file downloadSupplementary]

## Sheet: Sheet1
Table SII. Inhibitory effects of Saikosaponin A on the proliferation of HepG2 cells assessed by Cell Counting Kit-8 assay.
Saikosaponin A (μM)	24 h				48 h				72 h
0	0.928783	1.00189	1.02886	1.04046	0.957461	0.994207	1.01808	1.03025	0.944448	0.991191	1.02995	1.03441
5	0.884543	0.885892	0.886431	0.89884	0.86337	0.876946	0.920246	0.929374	0.939045	0.996007	1.03887	1.06084
10	0.835446	0.867548	0.893445	0.904235	0.81141	0.815389	0.819368	0.832943	0.882201	0.959833	0.965353	1.01445
15	0.751281	0.765579	0.772053	0.801726	0.779813	0.784494	0.818666	0.820772	0.756416	0.827236	0.975806	0.984967
20	0.541948	0.545185	0.551659	0.566496	0.525863	0.55395	0.554652	0.566355	0.624758	0.626637	0.671032	0.676552
30	0.040464	0.0563798	0.0693283	0.0771513	0.190696	0.198186	0.199356	0.200761	0.240707	0.271126	0.274884	0.278525
40	0.0625843	0.0628541	0.0725654	0.0733747	0.189526	0.202399	0.209655	0.221592	0.234717	0.241294	0.254566	0.268894
